# Supplementary material for: Type 1 Diabetes Mellitus and Cardiovascular Disease: A Scientific Statement From the American Heart Association and American Diabetes Association
Source: Oxford University Press journal article supplement (doi:10.2337/dc14-1720), 2014-08-12
Supplement: dc141720supplementarydata.pdf [file dc141720supplementarydata.pdf]

# SUPPLEMENTARY DATA

**Supplementary Table 1.** Prevalence and Incidence of CVD (Coronary Heart Disease and Stroke) in T1DM. Incidence is presented as percentage over the course of follow-up or in person-years (py).

| Study (Author, Year, PMID)     | Study design                                              | Population                                                                                            | Diabetes duration | Definition of CVD                                                                                                                                                                                                             | Baseline Prevalence                       | Follow-up               | Incidence                                                                           |
|--------------------------------|-----------------------------------------------------------|-------------------------------------------------------------------------------------------------------|-------------------|-------------------------------------------------------------------------------------------------------------------------------------------------------------------------------------------------------------------------------|-------------------------------------------|-------------------------|-------------------------------------------------------------------------------------|
| Roy, 2012<br>PMID: 22652842    | Retrospective medical record review                       | 725 African Americans with T1DM in Newark, NJ<br><br>Follow-up on 444 (62.1%)<br><br>Mean HbA1c 13.5% | 10.8 years        | Discharge diagnosis ICD-9 codes                                                                                                                                                                                               | Any CVD: 12.4%<br>CHD: 9%<br>Stroke: 4.5% | 6-year                  | Any CVD: 15.5%<br>CHD: 12.6%<br>Stroke: 3.3%                                        |
| Conway, 2009<br>PMID: 20368215 | Retrospective medical record and death certificate review | Pittsburgh EDC Study<br>658 diagnosed with T1DM in 1950-1980 with follow-up exams in 1986 and 1988    | 20 years          | -Fatal CHD: autopsy, coroner, or medical record<br><br>-Non-fatal CHD: medical records, Q-waves on EKG or revascularization procedures (CABG, angioplasty, coronary endarterectomy, or coronary artery stenosis $\geq 50\%$ ) | None                                      | Mean follow-up 15 years | Non-fatal MI: overall 19%<br>men: 22%<br>Women: 16%<br><br>Fatal CHD: 8.39% overall |

# SUPPLEMENTARY DATA

|                                  |                                                 |                                                                                                                                                                      |                                    |                                                                                                                                                                                         |                                        |           |                                                            |
|----------------------------------|-------------------------------------------------|----------------------------------------------------------------------------------------------------------------------------------------------------------------------|------------------------------------|-----------------------------------------------------------------------------------------------------------------------------------------------------------------------------------------|----------------------------------------|-----------|------------------------------------------------------------|
| Waden, 2009<br>PMID: 19651819    | Retrospective<br>medical record<br>review       | Finnish Diabetic<br>Nephropathy (Finn<br>Diane) Study<br><br>1,845 with T1DM<br><br>HbA1c 8.5%                                                                       | 22 years $\pm$ $\pm$<br>11.9 years | CVD includes MI, coronary<br>artery procedure (CABG,<br>angioplasty), stroke<br>(ischemic, hemorrhagic),<br>limb amputation secondary<br>to ischemia, or peripheral<br>artery procedure | (ND)                                   | 5.7 years | Total CVD: 8.6%                                            |
| Shankar, 2007<br>PMID: 17526864  | Retrospective<br>death<br>certificate<br>review | Total cohort 996<br>with T1DM<br><br>Wisconsin<br>Epidemiologic Study<br>of Diabetic<br>Retinopathy<br>(WESDR)<br><br>~90% White<br><br>HbA1c range 5.6% to<br>19.5% | >12 years                          | ICD-9 codes 410-459 (CHD,<br>stroke) listed as underlying<br>or contributory cause                                                                                                      | Angina:<br>3.1% MI: 3%<br>Stroke: 1.1% | 16 years  | Based on 879 without<br>baseline CVD:<br>CVD mortality 15% |
| Stettler, 2006<br>PMID: 16918825 | Retrospective<br>death<br>certificate<br>review | WHO multinational<br>study of vascular<br>disease in DM,<br>Switzerland data<br><br>165 (of original 225)                                                            | 23.5 years                         | Death due to cardiac disease<br>and ischemic heart disease<br>(IHD)<br><br>ICD-9 codes on death<br>certificate: 410-414 for IHD                                                         | (ND)                                   | 14 years  | CHD mortality: 17%                                         |

# SUPPLEMENTARY DATA

|                                        |                                                       |                                                                                                                 |             |                                                                                                                             |                                          |           |                                                                                                                                                                                                                                                                       |
|----------------------------------------|-------------------------------------------------------|-----------------------------------------------------------------------------------------------------------------|-------------|-----------------------------------------------------------------------------------------------------------------------------|------------------------------------------|-----------|-----------------------------------------------------------------------------------------------------------------------------------------------------------------------------------------------------------------------------------------------------------------------|
| Soedamah-Muthu, 2006<br>PMID: 16567818 | Retrospective electronic medical record review        | UK General Practice Research Database (GPRD)<br>7,479 with DM,<br>38,116 without DM                             | 15 years    | MI, coronary revascularizations, stroke                                                                                     | 3% at baseline (vs. 1% in non-diabetics) | 4.7 years | Absolute risk/1000 person years<br><br>Acute CHD:<br>Men: 3.5 (2.7-4.4)<br>Women: 2.9 (2.2-3.9)<br><br>Coronary revascularization:<br>Men: 2.0 (1.5-2.8)<br>Women: 1.5 (1.0 – 2.3)<br><br>Stroke (fatal and non-fatal):<br>Men: 2.7 (2.1-3.6)<br>Women: 2.0 (1.4-2.8) |
| Nathan, 2005<br>PMID: 16371630         | RCT of intensive vs. conventional diabetes management | DCCT/EDIC Follow-up Study<br>1,441 with T1DM<br><br>1,422 completed DCCT and joined EDIC<br><br>-HbA1c 7.8-7.9% | 23-24 years | Non-fatal MI, stroke, CVD death, confirmed angina, coronary artery revascularization, sub-clinical/silent MI via annual ECG | none                                     | 17 years  | 144 events in 83 participants<br><br>Intensive group:<br>0.38/100 person-years<br><br>Conventional group:<br>0.80/100 person-years                                                                                                                                    |
| Janghorbani, M 2007                    | Prospective cohort                                    | Nurses' Health Study                                                                                            | 31.4 years  | CVA                                                                                                                         | (ND)                                     | 24 years  | 33/303 women with T1DM had a CVA (475/100,000 person-years)                                                                                                                                                                                                           |

# SUPPLEMENTARY DATA

|                                     |                                                             |                                                                                                                                |                |                                                                                                                                                                                                                                     |                                                                |                                                             |                                                                                                                                 |
|-------------------------------------|-------------------------------------------------------------|--------------------------------------------------------------------------------------------------------------------------------|----------------|-------------------------------------------------------------------------------------------------------------------------------------------------------------------------------------------------------------------------------------|----------------------------------------------------------------|-------------------------------------------------------------|---------------------------------------------------------------------------------------------------------------------------------|
| Skrivarhaug, 2006<br>PMID: 16365724 | Retrospective<br>registry review                            | Norwegian<br>Childhood Diabetes<br>Registry<br><br>1,096 with T1DM<br>(872 female, 1,034<br>male)                              | Up to 30 years | Death certificates and ICD-<br>10 codes (underlying cause<br>only)<br><br>CVD death: I20-I25 and<br>I44-I49—acute MI, fatal<br>arrhythmia<br><br>CVA death: I60-I69—<br>ischemic cerebral and<br>intracranial hemorrhagic<br>events | (ND)                                                           | Over 24.2 years<br>with 46,147<br>person-years<br>follow-up | CHD:<br>26.3/100,000 py in<br>men<br>10.3/100,00 py in<br>women<br><br>CVA:<br>Men: 17.6/100,000 py<br>Women: 0/100,000<br>py   |
| Klein BEK, 2004<br>PMID: 15451768   | Prospective<br>cohort and<br>death<br>certificate<br>review | WESRD<br>996 with T1DM                                                                                                         | (ND)           | Any CVD: (ICD-9 402, 404,<br>410-429; ICD-10 I20-I51)                                                                                                                                                                               | angina 3.1%<br>myocardial<br>infarction<br>3.0%<br>stroke 1.0% | 20 years                                                    | Age-adjusted<br>cumulative incidence<br>Angina: 18.1%<br>MI: 14.8%<br>Stroke: 5.9%                                              |
| Schram, 2003<br>PMID: 14597846      | Prospective<br>cohort with<br>medical record<br>review      | EURODIAB<br>Prospective<br>Complications Study<br>Europeans with<br>T1DM<br><br>2,565 with full CVD<br>data<br><br>-HbA1c 6.7% | 13.3 years     | MI, angina, CABG, stroke,<br>and/or ischemic changes on<br>centrally coded ECG, and/or<br>fatal CHD, stroke, or other<br>CVD                                                                                                        | CVD at<br>baseline:<br>9.6%                                    | 7.4 years                                                   | All CVD 6.35%<br><br>ECG abnormality:<br>3.74%<br>Angina: 1.09%<br>MI: 2.1%<br>Stroke: 0.74%<br>CABG: 0.43%<br>CVD death: 0.62% |

# SUPPLEMENTARY DATA

|                               |                                                      |                                                                                                          |      |                                                                                                                 |          |                                                      |                                                                                                                                                                                                                                                                                                                                                                              |
|-------------------------------|------------------------------------------------------|----------------------------------------------------------------------------------------------------------|------|-----------------------------------------------------------------------------------------------------------------|----------|------------------------------------------------------|------------------------------------------------------------------------------------------------------------------------------------------------------------------------------------------------------------------------------------------------------------------------------------------------------------------------------------------------------------------------------|
| Laing, 2003<br>PMID: 12774166 | Death<br>certificate and<br>medical record<br>review | 23,751 insulin-treated<br>diabetic individuals<br><30 years identified<br>1972-1973 in United<br>Kingdom | (ND) | Death certificate codes for<br>CVD: ICD-9 391-398, 402,<br>404-429<br><br>CHD: ICD-9 410-414,<br>429.2          | excluded | 17 years,<br>contributing<br>404,073<br>person-years | CHD mortality:<br>Men: 107/100,000<br>person-years<br>Women: 73/100,000<br>person-years<br><br>All heart disease:<br><br>Men<br>26.4/100,000 person-<br>years 1-39 years of<br>age<br><br>1194.9/100,000<br>person-years 40-84<br>years of age<br><br>Women<br>27.4/100,000 person-<br>years 1-39 years of<br>age<br><br>804.5/100,000<br>person-years 40-84<br>years of age |
| Liang, 2003<br>PMID: 12574553 | Death<br>certificate and<br>medical record<br>review | 23,751 insulin-treated<br>DM individuals <30<br>years identified 1972-<br>1973 in United<br>Kingdom      | (ND) | Overall CVA mortality ICD-<br>9 codes 430-438<br>Hemorrhagic (430.0-432.9)<br>Non-hemorrhagic (430.0-<br>437.1) | excluded | 17 years                                             | CVA<br>Men: 18.7/100,000<br>person-years<br><br>Women:<br>21.1/100,000 person-<br>years                                                                                                                                                                                                                                                                                      |

## SUPPLEMENTARY DATA

|                              |                                                      |                                                                                    |            |                                                                                                                                                                                                |            |           |                                                    |
|------------------------------|------------------------------------------------------|------------------------------------------------------------------------------------|------------|------------------------------------------------------------------------------------------------------------------------------------------------------------------------------------------------|------------|-----------|----------------------------------------------------|
| Weis, 2001<br>PMID: 11704692 | Death<br>certificate and<br>medical record<br>review | 147 individuals with<br>T1DM Portsmouth<br>Outpatient Clinics in<br>United Kingdom | 5-20 years | CHD established by Rose<br>questionnaire or via ECG<br>using Minnesota-coded 12-<br>lead ECG. Causes of death<br>ascertained from death<br>certificate, hospital notes, or<br>postmortem exams | (excluded) | >14 years | CVD death: 6.8%<br>Fatal and non-fatal<br>CHD: 17% |
|------------------------------|------------------------------------------------------|------------------------------------------------------------------------------------|------------|------------------------------------------------------------------------------------------------------------------------------------------------------------------------------------------------|------------|-----------|----------------------------------------------------|

CHD – coronary heart disease, CVA - cerebrovascular disease, CVD - cardiovascular disease, Diabetes Control and Complications Trial (DCCT), EDIC - Epidemiology of Diabetes Interventions and Complications ICD - International Classification of Diseases, PAD – peripheral artery disease, GPRD - General Practice Research Database, T1DM – type 1 diabetes mellitus.

# SUPPLEMENTARY DATA

**Supplementary Table 2.** T1DM and peripheral arterial disease (PAD). All references notated by their PMID number.

| Study (Author, Year, PMID)                        | Study design                  | Population                                                                                                                                                 | Diabetes duration | Definition of PAD                                                                             | Baseline prevalence | Follow-up  | Incidence                                                                          |
|---------------------------------------------------|-------------------------------|------------------------------------------------------------------------------------------------------------------------------------------------------------|-------------------|-----------------------------------------------------------------------------------------------|---------------------|------------|------------------------------------------------------------------------------------|
| McAlpine 2005<br>PMID<br>15717888                 | population-based registry     | 942 T1DM patients from Tayside, Scotland obtained from the Diabetes Audit and Research in Tayside, Scotland (DARTS) registry who were free of LEA          | (ND)              | LEA                                                                                           | (excluded)          | (ND)       | per 1000 patients with T1DM<br><br>PAD:<br>5.5 (2.4-12.8)<br>LEA:<br>3.2 (1.2-9.4) |
| Moss 1999<br>PMID<br>10372248,<br>PMID<br>1546925 | Population-based study        | -906 T1DM patients from the WESDR (defined as age of onset of <30 years).<br><br>-mean A1c 10.8%                                                           | 13.5 years        | LEA                                                                                           | 2.4%                | 14 years   | LEA 7.2%                                                                           |
| Jonasson et al, 2008<br>(PMID<br>18443192)        | National health registry data | -31,354 patients with T1DM from the Swedish Inpatient Registry identified from 1975-2004 compared to the Swedish population<br>-incident non-traumatic LEA | (ND)              | LEA                                                                                           | (ND)                | 12.5 years | by age 65 years, cumulative probability of LEA was 11% (women) and 20.7% (men)     |
| Olson 2002<br>PMID<br>11833057                    | Prospective cohort            | 586 T1DM patients from the Pittsburgh Epidemiology Complications Study<br><br>mean HbA1c 10.3-10.9                                                         | 19 years          | claudication, ischemia, ulceration, gangrene, amputation, infection, necrobiosis diabeticorum | (excluded)          | 10 years   | incidence 1.3/100 person-years                                                     |
| Roy et al, 2008<br>(PMID<br>18346155)             | Prospective cohort            | 457 African Americans with T1DM<br><br>-mean HbA1c 13.5%                                                                                                   | 10.4 years        | history of amputation or leg angioplasty                                                      | (excluded)          | 6 years    | 5.7% of patients developed LEAD                                                    |

ABI- ankle-brachial index, DCCI -, DM- diabetes mellitus, EDIC- LEAD- lower extremity arterial disease, T1DM- type I diabetes mellitus, WESDR- Wisconsin Epidemiologic Study of Diabetic Retinopathy.

# SUPPLEMENTARY DATA

**Supplementary Table 3.** T1DM, cIMT and CAC. All references notated by their PMID number.

| Study                                | Population                                                                                                                                                                                                                                                                                                                                                            | Epidemiology Data                                                                                                                                                                          |
|--------------------------------------|-----------------------------------------------------------------------------------------------------------------------------------------------------------------------------------------------------------------------------------------------------------------------------------------------------------------------------------------------------------------------|--------------------------------------------------------------------------------------------------------------------------------------------------------------------------------------------|
| <b>cIMT</b>                          |                                                                                                                                                                                                                                                                                                                                                                       |                                                                                                                                                                                            |
| Margeirsdottir 2010<br>PMID 20530748 | -314 T1DM children and adolescents from Norway compared to 118 age-matched healthy controls<br>-mean age 13.7 years<br>-mean DM duration 5.5 years<br>-mean A1c 8.4%                                                                                                                                                                                                  | -mean cIMT higher in boys with T1DM (0.46 mm) vs controls (0.44 mm, $p=0.04$ ); no difference observed in girls<br>-no carotid plaques were observed                                       |
| Yamasaki 1996<br>PMID 8168638        | -105 patients with T1DM (4-25 years of age), 529 patients with type 2 DM (31-86 years of age), 104 non-DM controls (7-76 years of age)<br>-DM duration 0.5-49 years                                                                                                                                                                                                   | -cIMT values in T1DM patients (10-19 years of age, 0.525 mm) or 20-25 years of age (0.696 mm) were greater than age-matched non-DM patients (0.444, $p=0.01$ to $p<0.001$ )                |
| Jarvisalo 2002<br>PMID 11812760      | -50 T1DM patients, 35 age-sex-body size matched controls<br>-mean age 11 years<br>-DM duration 4.4 years<br>-mean HbA1c 8.9%                                                                                                                                                                                                                                          | -mean cIMT higher in T1DM patients (0.47 mm) vs controls (0.42 mm, $p<0.001$ )                                                                                                             |
| Dalla Pozza 2007<br>PMID 17374703    | -150 T1DM patients -mean HbA1c 7.8%<br>-mean age 13.9 years                                                                                                                                                                                                                                                                                                           | -mean cIMT higher in T1DM (0.46 mm) vs controls (0.42 mm, $p=0.002$ ) in multivariable models adjusted for age, sex, DM duration, BMI, systolic blood pressure                             |
| DCCT/EDIC, 2003<br>(PMID 12788993)   | -1229 T1DM patients (611 conventional Rx; 618 intensive Rx) from the DCCT trial followed longer term as part of the EDIC study and 222 healthy controls (mean age 39 years)<br>-carotid ultrasound in 1994-1996 and 1998-2000<br>-mean age 34-36 years<br>-mean DM duration 13.3-14.2 years<br>-mean HbA1c during DCCT: 7.2-9.1%<br>-mean HbA1c year 1 EDIC: 7.8-8.3% | -by year 6 of EDIC, T1DM cIMT greater than non-DM controls ( $p<0.003$ )<br>-less progression of IMT in the intensive arm of DCCT (0.032 mm) vs the conventional arm (0.023 mm, $p=0.01$ ) |



# SUPPLEMENTARY DATA

|                                                                                             |                                                                                                                                                                                                                                                |                                                                                                                                                                                                      |
|---------------------------------------------------------------------------------------------|------------------------------------------------------------------------------------------------------------------------------------------------------------------------------------------------------------------------------------------------|------------------------------------------------------------------------------------------------------------------------------------------------------------------------------------------------------|
| Distiller et al, 2006<br>(PMID 16949514)                                                    | -148 patients with T1DM of relatively-long duration (>18 years)<br>-mean age 48 years<br>-mean DM duration 26 years<br>-median HbA1c 7.8%<br>-examined carotid plaque (defined as irregular thickening of at least 1.5 mm) in addition to cIMT | -multivariable predictors of IMT are age, DM duration, BMI, hypertension, HDL<br>-multivariable predictors of carotid plaque are age, HTN, smoking, retinopathy                                      |
| Larsen et al, 2004<br>(PMID 15759107)                                                       | -39 T1DM patients followed prospectively for 18 years compared to a healthy reference population<br>-mean age 42-44 years<br>-mean DM duration 30-31 years<br>-mean HbA1c 8.1-8.3%<br>-examined cIMT and iVUS                                  | -IMT consistently higher in T1DM compared to a healthy population across age groups (35-45 and 45-55 years)<br>- IMT associated with percent coronary vessel area stenosis by IVUS (r=0.43, p=0.034) |
| Ogawa et al, 2009<br>(PMID 19763015)                                                        | -73 T1DM patients with long DM duration (at least 20 years)<br>-mean age 37.2-38.4 years<br>-mean duration 26.4-27.8 years<br>-mean A1c 7.7-8.1%<br>-examined cIMT and plaque, defined as IMT $\geq$ 1.1 mm                                    | -multivariable correlates of cIMT include age and dyslipidemia<br>-age, age at DM diagnosis, and HbA1c during adolescence associated with plaque presence                                            |
| <b>CAC</b>                                                                                  |                                                                                                                                                                                                                                                |                                                                                                                                                                                                      |
| Lopes-Virella et al. 2011<br>DCCT<br>(PMID:21156319)                                        | 476 T1DM patients from DCCT                                                                                                                                                                                                                    | Oxidized LDL from baseline samples correlates with subsequent development of CAC 11-20 years later                                                                                                   |
| Snell-Bergeon JK et al.<br>2010 (PMID: 21059097)<br>Schauer et al. 2011<br>(PMID: 20978091) | CACTI study of T1DM patients.                                                                                                                                                                                                                  | Measures of mean glucose and glucose variability were associated with CAC in men.<br>Higher non-esterified fatty acid levels were associated with CAC                                                |
| Rodrigues TC et al. 2010<br>(PMID: 21088805)                                                | 100 patients with T1DM but without CAD or end-stage renal disease                                                                                                                                                                              | Insulin resistance, measured using the estimated glucose disposal rate (eGDR), was worse in those with worse CAC                                                                                     |

## SUPPLEMENTARY DATA

|                                                    |                                                                                 |                                                                                                                                                                    |
|----------------------------------------------------|---------------------------------------------------------------------------------|--------------------------------------------------------------------------------------------------------------------------------------------------------------------|
| Rodrigues TC et al. 2011<br>(PMID: 20855932)       | 261 patients with T1DM, 100 of them had CAC measured;<br>cross sectional study  | Hypertension is associated with CAC more strongly than metabolic syndrome                                                                                          |
| Salem M et al. 2011<br>(PMID: 20706852)            | 60 adolescents (ages 12-18 years) with T1DM for 10 to 15 years duration         | Twelve patients with diabetes (20%) had positive CAC. CAC was associated with smoking, age, duration of diabetes, severe retinopathy, nephropathy and higher A1C   |
| Maurovich-Horvat P et al. 2010<br>(PMID: 20581785) | 21 patients with T1DM, cross-sectional study                                    | CAC was associated with measures of glucose disposal, age, disease duration, waist circumference, LDL but not A1C.                                                 |
| Conway B et al. 2010<br>(PMID: 20388043)           | 105 patients from the Pittsburgh EDC study.                                     | CAC was associated with skin fluorescence, an indicator of accumulation of advanced glycation end products (AGEs), particularly in those with severe CAC.          |
| Colhoun HM et al. 2008<br>(PMID: 18230111)         | 199 patients with T1DM                                                          | Serum IgG to bacteria involved in periodontal disease <i>P. gingivalis</i> and <i>A. actinomycetemcomitans</i> are associated with coronary artery atherosclerosis |
| Conway B et al. 2007<br>(PMID: 18158704)           | 315 individuals with T1DM. Mean age and diabetes duration were 42 and 34 years. | Adiposity was measured by CT (visceral and subcutaneous). Adiposity was associated with the presence but not the degree of CAC.                                    |

CAC- coronary artery calcification, DM- diabetes mellitus, T1DM- type I diabetes mellitus, WESDR- Wisconsin Epidemiologic Study of Diabetic Retinopathy.
